# Supplementary material
Source: publisher figshare collection journal article supplement (https://acs.figshare.com/ndownloader/files/22124853)
Supplement: Supplementary file 1 [file 22124853]

## Supporting information

### Nanoporous Silver Sub-microcubes Layer-by-Layer Encapsulated with Polyelectrolytes Films: Nonenzymatic Catalysis for Glucose Monitoring

Perumal Viswanathan, Young Jin Kim and Jong Dal Hong\*

Department of Chemistry, Incheon National University, 119 Academy-ro Yeonsu-gu  
Incheon 22012, Republic of Korea.

\*Corresponding author. Tel.: 82-32-835-8234; Fax: 82-32-835-0762.

*E-mail address:* hong5506@inu.ac.kr.

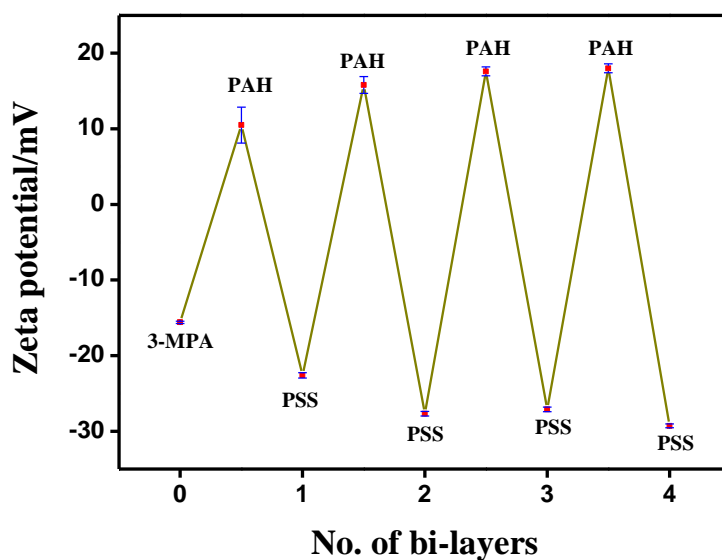

**Figure S1.** Zeta-potential values obtained for Np-Ag modified with 3-MPA, and subsequent LBL-coating of PAH and PSS onto it.

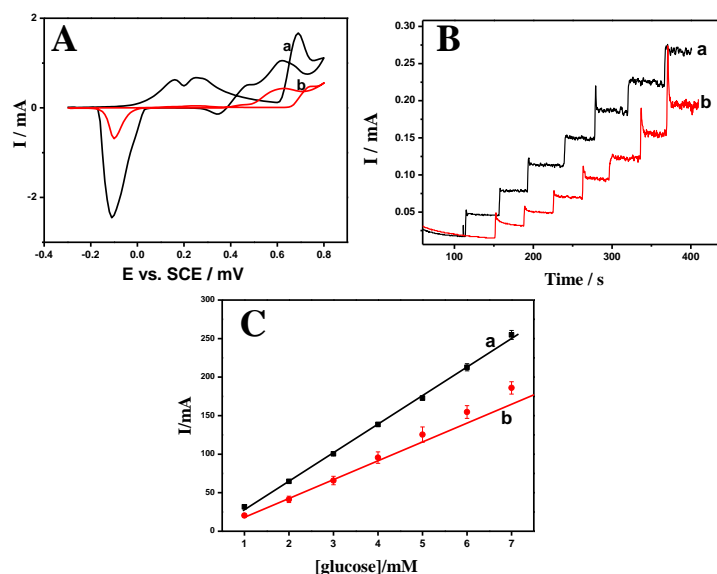

**Figure S2.** A) Cyclic voltammograms recorded for 10 mM glucose at Np-Ag(PAH/PSS)<sub>2</sub> (a) and 3-MPA modified Np-Ag (3-mercaptopropionic acid modified Np-Ag) (b) in 0.2 M NaOH. B) Amperometry i-t curve obtained at Np-Ag(PAH/PSS)<sub>2</sub> (a) and 3-MPA modified Np-Ag (b) for each addition of 1 mM glucose and the corresponding plot of current response *versus* glucose concentration (C).

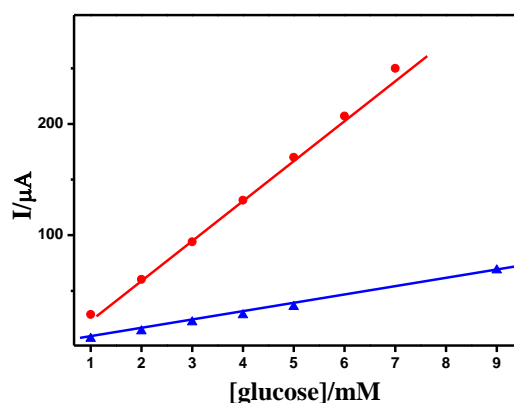

**Figure S3.** Amperometry current response obtained at Np-Ag(PAH/PSS)<sub>2</sub> (red) and nafion modified Np-Ag electrodes (Blue) plotted against glucose concentration. Applied voltage = 0.6 V

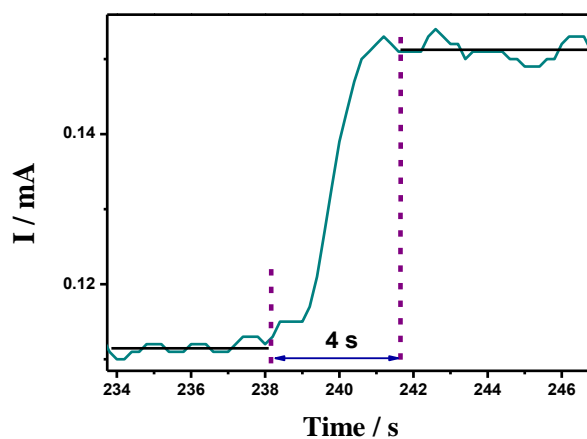

**Figure S4.** Amperometry current response time obtained at Np-Ag(PAH/PSS)<sub>2</sub> electrode for the addition of 1 mM glucose at an applied potential of 0.6 V.

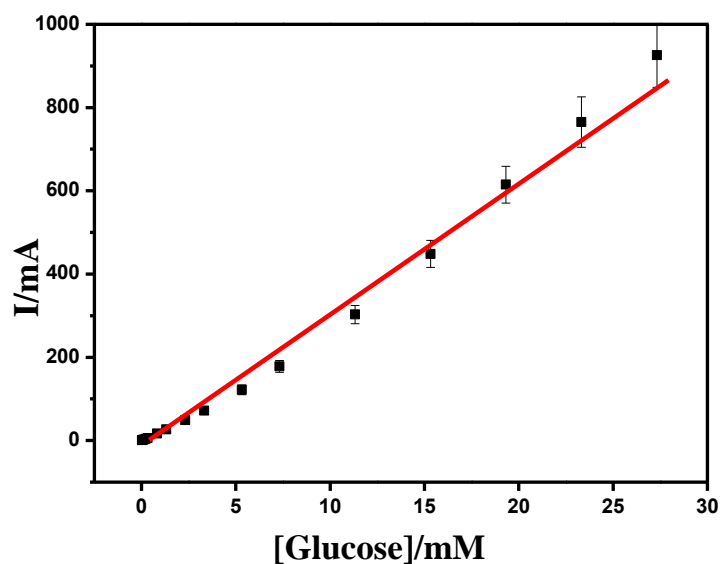

**Figure S5.** The calibration plot of amperometry current response *versus* glucose concentration obtained at Np-Ag(PAH/PSS)<sub>2</sub> electrode at an applied potential of 0.6 V.
